# Supplementary material for: Establishment of a patient-derived intrahepatic cholangiocarcinoma xenograft model with KRAS mutation
Source: BMC Cancer. 2016 Feb 11;16:90. doi: 10.1186/s12885-016-2136-1 (PMC4750214; doi:10.1186/s12885-016-2136-1)
Supplement: Additional file 4: Table S4. — Relative quantitation of deregulated microRNA using the comparative Ct method. (DOCX 18 kb) [file 12885_2016_2136_MOESM4_ESM.docx]

**Supplementary table 4. Relative quantitation of deregulated microRNA using the comparative Ct method**

| **Sample** | **miR-21** | **RPL21** | **average miR-21** | **average RPL21** | **Ct mCtmiR-21-mCtRPL21** | **CT** | **2^Ct** |
| --- | --- | --- | --- | --- | --- | --- | --- |
| **PNLT** | **16.08** | **23.99** | 16.187 | 24.18 | -7.993333333 | 0 | 1 |
|  | **16.27** | **24.28** |  |  |  |  |  |
|  | **16.21** | **24.27** |  |  |  |  |  |
| **PDX** | **14.39** | **22.90** | 14.503 | 22.99 | -8.486666667 | -0.49333 | 1.407694 |
|  | **14.62** | **23.13** |  |  |  |  |  |
|  | **14.50** | **22.94** |  |  |  |  |  |
| **Sample** | **miR-199** | **RPL21** | **average miR-199** | **average RPL21** | **Ct mCtmiR-199-mCtRPL21** | **CT** | **2^Ct** |
| **PNLT** | **18.12** | **23.99** | 18.32666667 | 24.18 | -5.853333333 | 0 | 1 |
|  | **18.34** | **24.28** |  |  |  |  |  |
|  | **18.52** | **24.27** |  |  |  |  |  |
| **PDX** | **17.92** | **22.90** | 18.29333333 | 22.99 | -4.696666667 | 1.156667 | 0.448548 |
|  | **18.49** | **23.13** |  |  |  |  |  |
|  | **18.47** | **22.94** |  |  |  |  |  |
| **Sample** | **miR-200** | **RPL21** | **average miR-200** | **average RPL21** | **Ct mCtmiR-200-mCtRPL21** | **CT** | **2^Ct** |
| **PNLT** | **24.00** | **23.99** | 24.29 | 24.18 | 0.11 | 0 | 1 |
|  | **24.43** | **24.28** |  |  |  |  |  |
|  | **24.44** | **24.27** |  |  |  |  |  |
| **PDX** | **14.95** | **22.90** | 15.09666667 | 22.99 | -7.893333333 | -8.00333 | 256.5922 |
|  | **15.23** | **23.13** |  |  |  |  |  |
|  | **15.11** | **22.94** |  |  |  |  |  |
| **Sample** | **miR-31** | **RPL21** | **average miR-31** | **average RPL21** | **Ct mCtmiR-31-mCtRPL21** | **CT** | **2^Ct** |
| **PNLT** | **26.79** | **23.99** | 26.73 | 24.18 | 2.55 | 0 | 1 |
|  | **26.72** | **24.28** |  |  |  |  |  |
|  | **26.68** | **24.27** |  |  |  |  |  |
| **PDX** | **16.57** | **22.90** | 16.64666667 | 22.99 | -6.343333333 | -8.89333 | 475.5105 |
|  | **16.57** | **23.13** |  |  |  |  |  |
|  | **16.80** | **22.94** |  |  |  |  |  |

The Ct value is determined by subtracting the average RPL21 Ct value from the average selected microRNA Ct values.

The calculation of Ct involves subtraction by the Ct calibrator value (pool of normal liver tissue: PNLT).

The range given for selected microRNA relative to calibrator value is determined by evaluating the expression 2- Ct
